# Supplementary material for: Mining the Yucatan Coastal Microbiome for the Identification of Non-Ribosomal Peptides Synthetase (NRPS) Genes
Source: MDPI journal article supplement (doi:10.3390/toxins12060349), 2020-05-26
Supplement: s1 [file s1]

# Supplementary Materials: Mining the Yucatan Coastal Microbiome for the Identification of Non-Ribosomal Peptides Synthetase (NRPS) Genes

Mario Alberto Martínez-Núñez and Zuemy Rodríguez-Escamilla

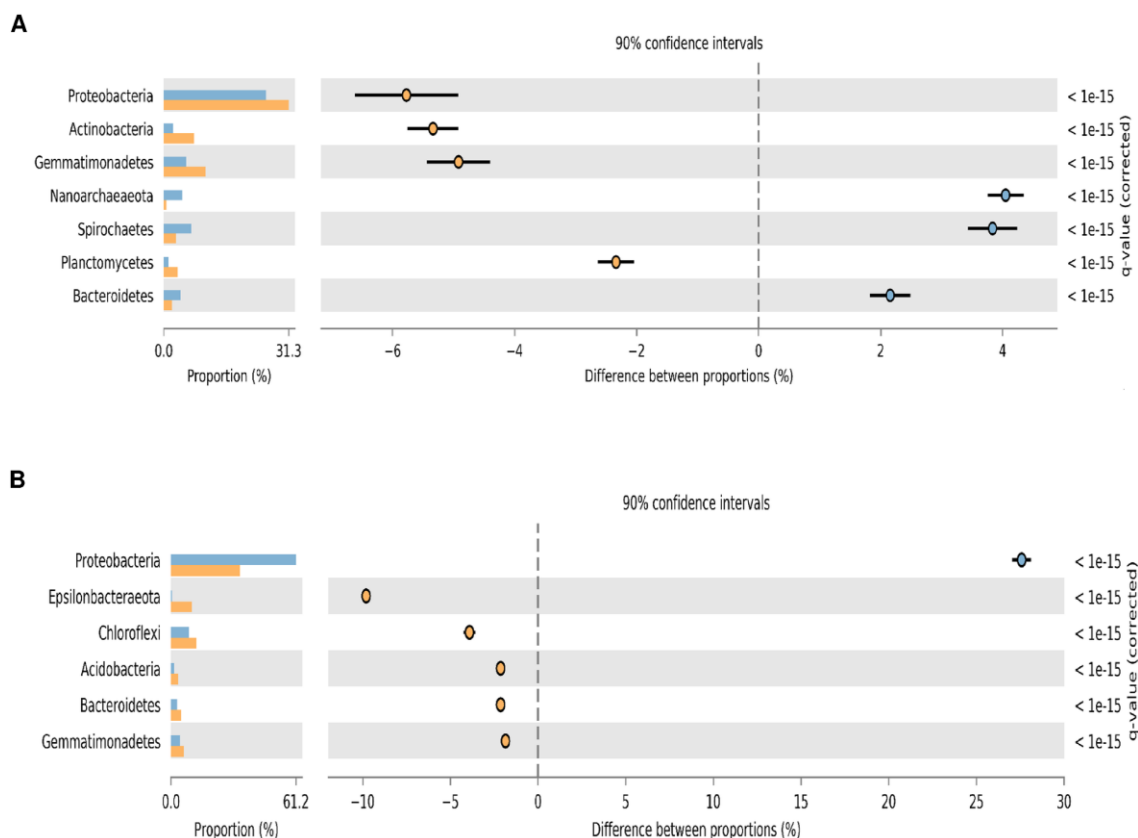

**Figure S1.** Metataxonomic profile comparisons at the phylum level between the Sisal and Palmar samples using STAMP software.
